# Supplementary material for: A novel sensing membrane for the determination of ferric ions in aqueous solutions
Source: Royal Society of Chemistry journal article supplement (doi:10.1039/c5ay00133a), 2015-01-01
Supplement: c5ay00133a1.pdf [file c5ay00133a1.pdf]

## Supporting Information

### **A novel sensing membrane for the determination of ferric ion in aqueous solutions**

Wenjuan Fu, Xiangfeng Guo\*, Lihua Jia\*, Ying Ding

College of Chemistry and Chemical Engineering, Key Laboratory of Fine Chemicals of

College of Heilongjiang Province, Qiqihar University, Qiqihar 161006, China.

\*Corresponding author. Email: xfguo@163.com (Guo X.), jlh29@163.com (Jia L.).

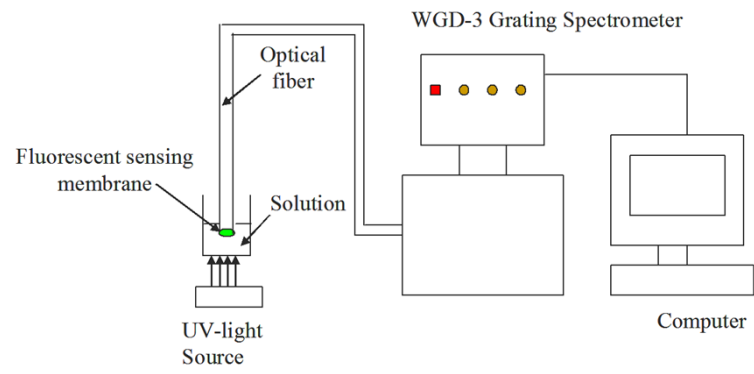

**Figure S1** Construction of the fluorescence detection system.

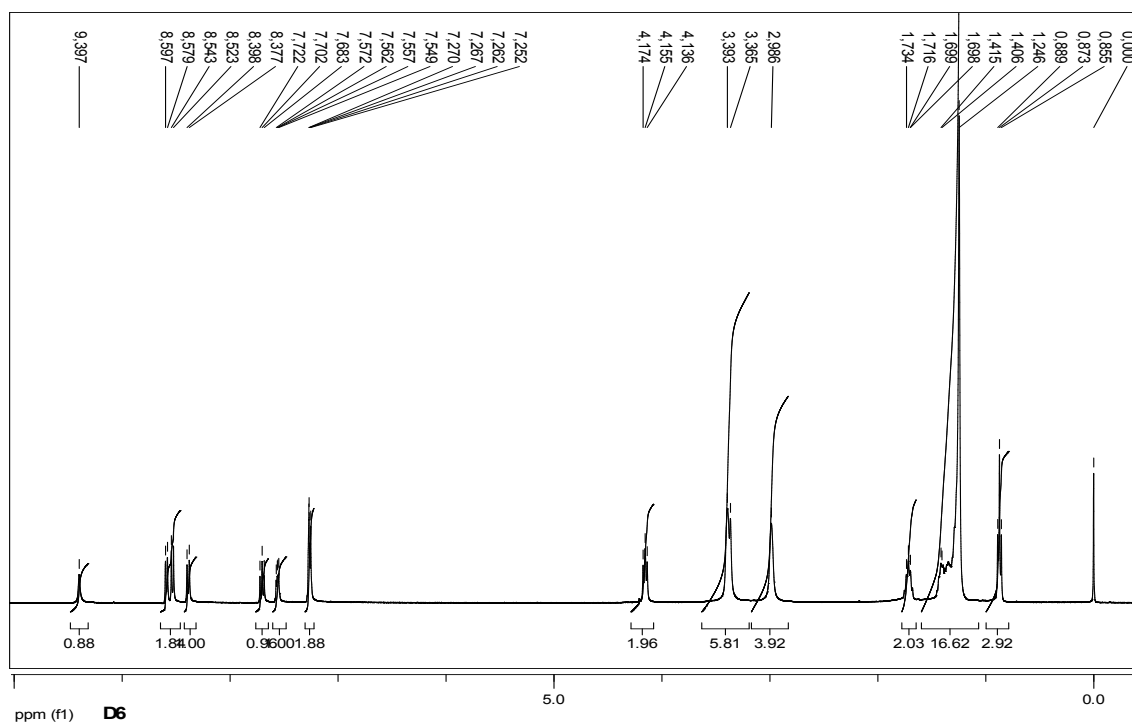

Figure S2 <sup>1</sup>H NMR of D6

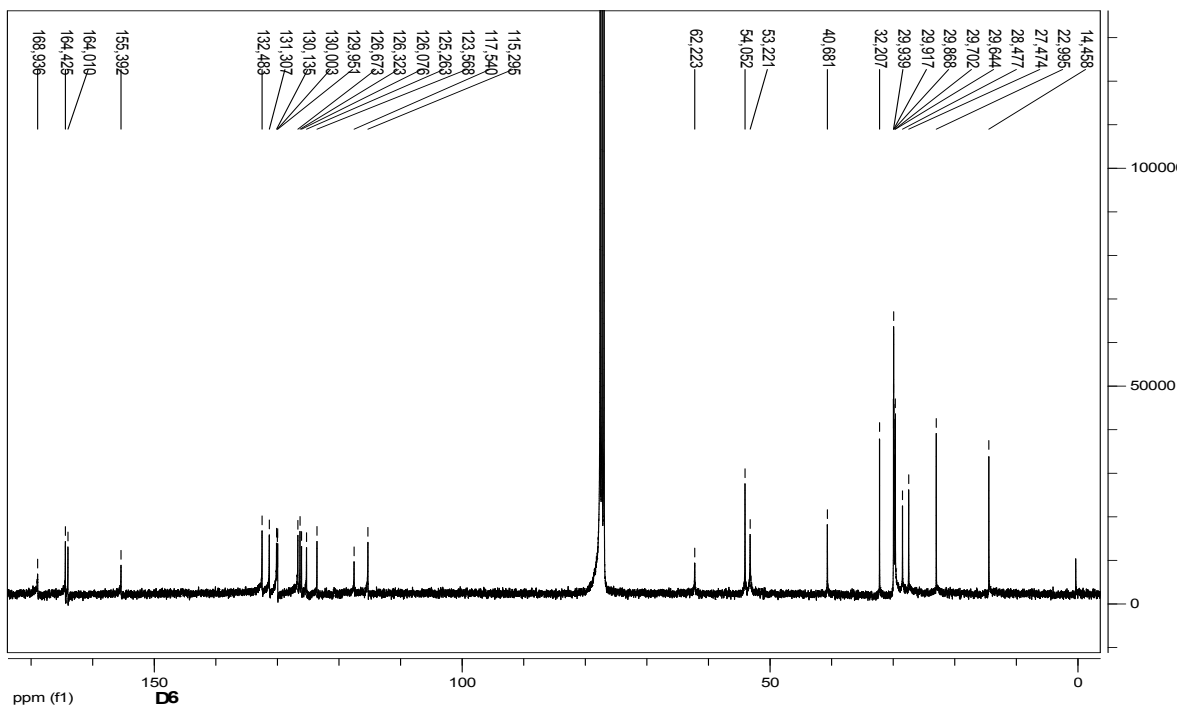

Figure S3  $^{13}\text{C}$  NMR of D6

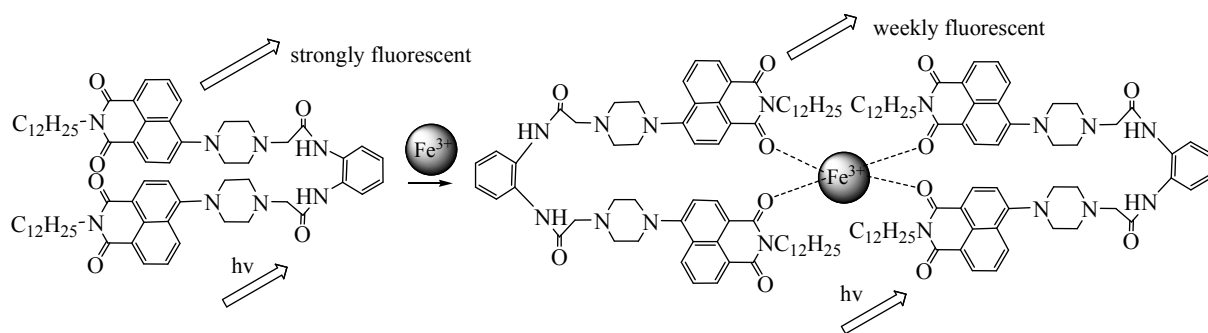

**Figure S4** The impossible mode of  $\text{Fe}^{3+}$  binding with D6

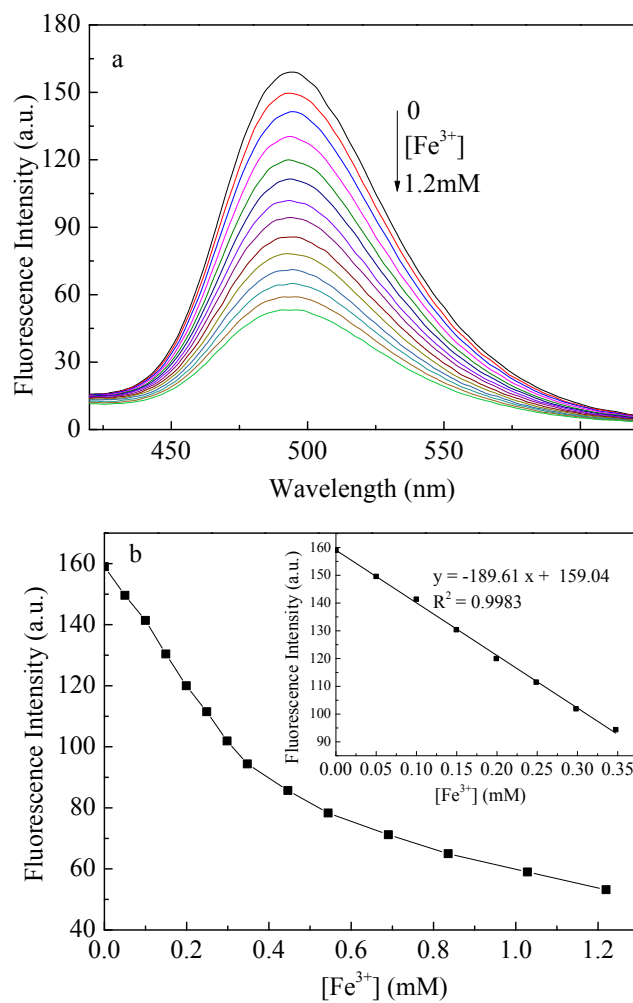

**Figure S5** Fluorescence spectra (a) and fluorescence intensity (b) of SM-1 in aqueous solutions of HAc-NaAc (10 mM) with increasing concentrations of Fe<sup>3+</sup> at pH 5.0.  $\lambda_{\text{ex}} = 365$  nm.

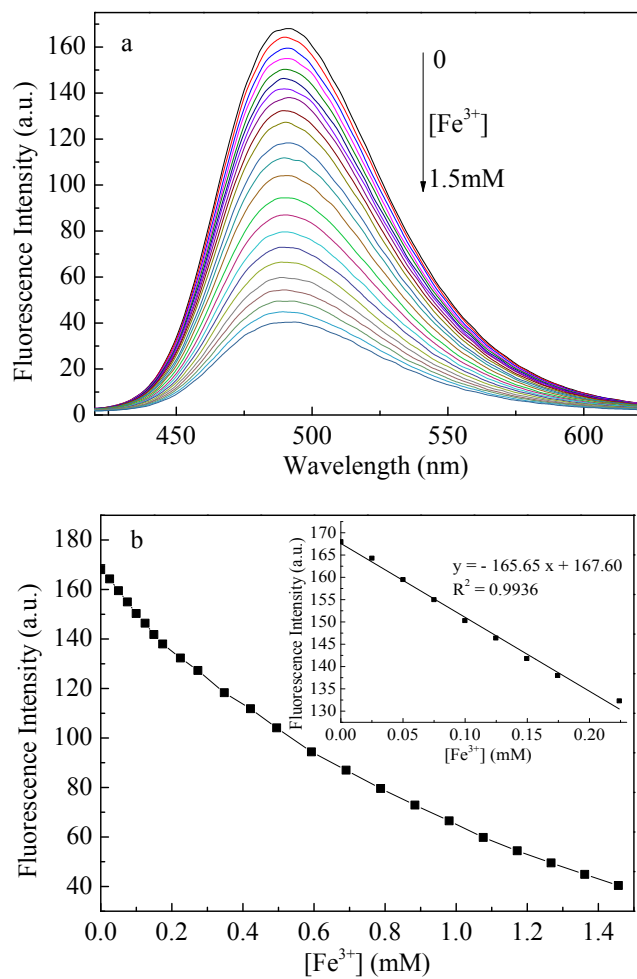

**Figure S6** Fluorescence spectra (a) and fluorescence intensity (b) of SM-2 in aqueous solutions of HAC-NaAc (10 mM) with increasing concentrations of  $Fe^{3+}$  at pH 5.0.  $\lambda_{ex} = 365$  nm.

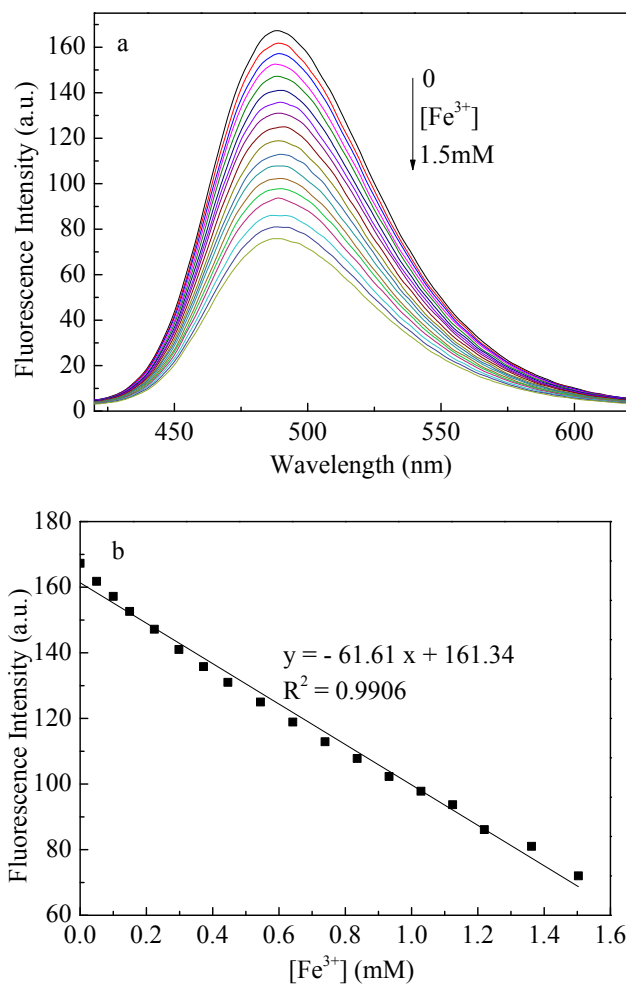

**Figure S7** Fluorescence spectra (a) and fluorescence intensity (b) of SM-3 in aqueous solutions of HAC-NaAc (10 mM) with increasing concentrations of Fe<sup>3+</sup> at pH 5.0.  $\lambda_{\text{ex}} = 365$  nm.



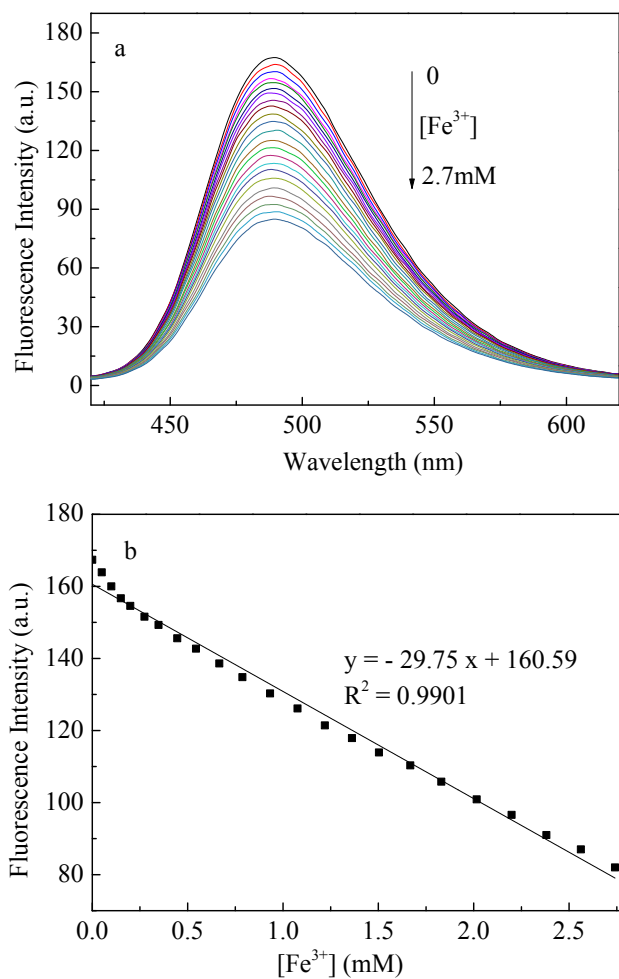

**Figure S8** Fluorescence spectra (a) and fluorescence intensity (b) of SM-4 in aqueous solutions of HAc-NaAc (10 mM) with increasing concentrations of Fe<sup>3+</sup> at pH 5.0.  $\lambda_{\text{ex}} = 365$  nm.

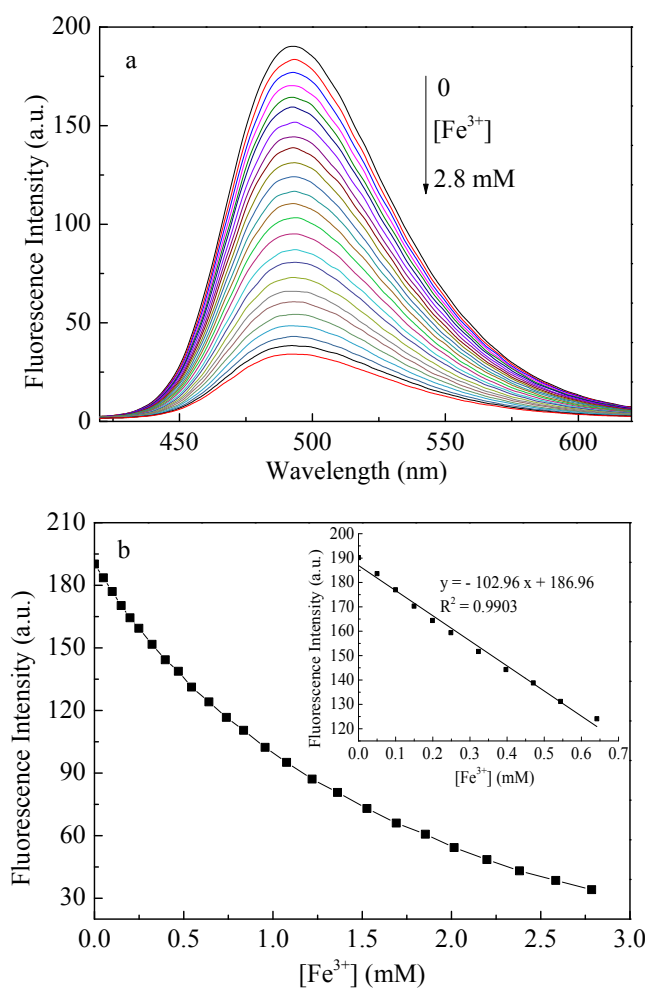

**Figure S9** Fluorescence spectra (a) and fluorescence intensity (b) of SM-5 in aqueous solutions of HAC-NaAc (10 mM) with increasing concentrations of Fe<sup>3+</sup> at pH 5.0.  $\lambda_{\text{ex}} = 365$  nm.
